# Supplementary material
Source: Springer Nature journal article supplement (https://publikationen.ub.uni-frankfurt.de/opus4/files/22066/13064_2011_173_MOESM4_ESM.PDF)

Shh-GIFM, rostral-caudal contribution, E18.5

Gli1-GIFM, rostral-caudal contribution, E18.5

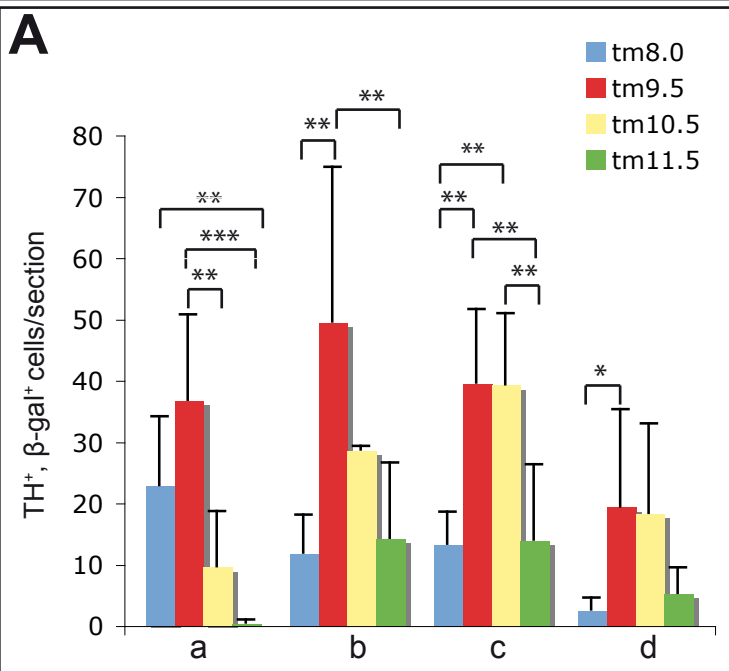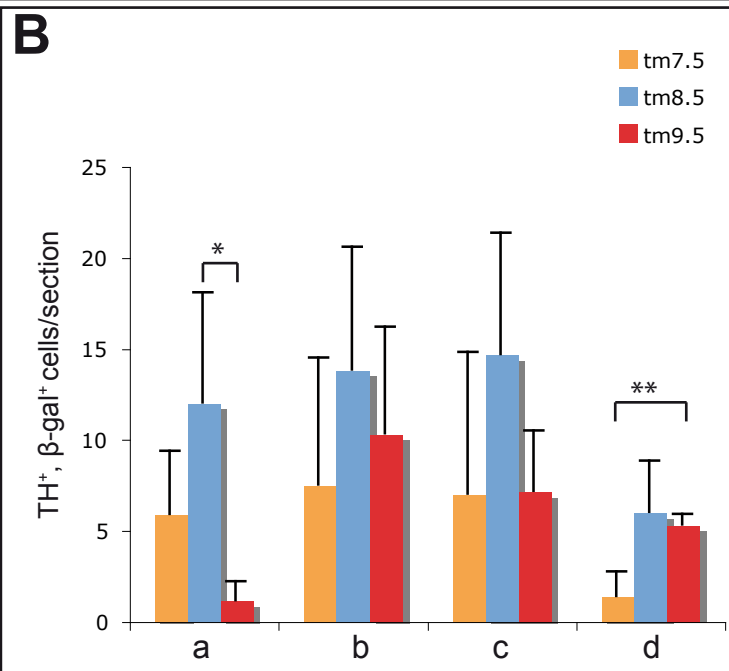

Shh-GIFM, subpopulations, adult

Gli1-GIFM, subpopulations, adult

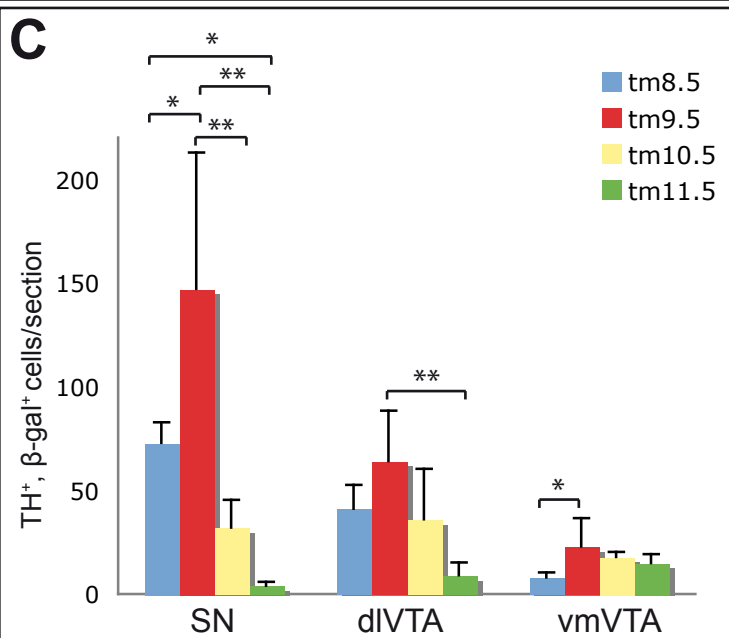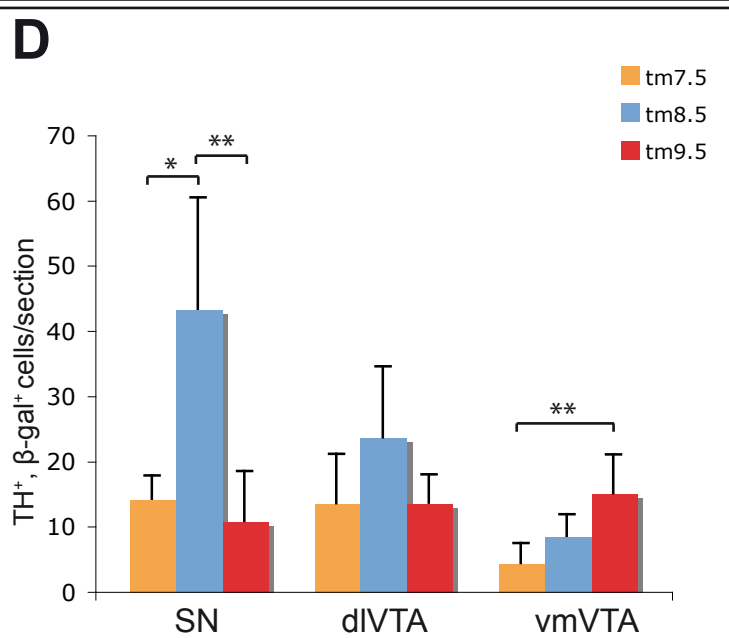

Shh-GIFM, Relative contribution to DA nuclei

Shh-GIFM, Relative contribution to DA nuclei

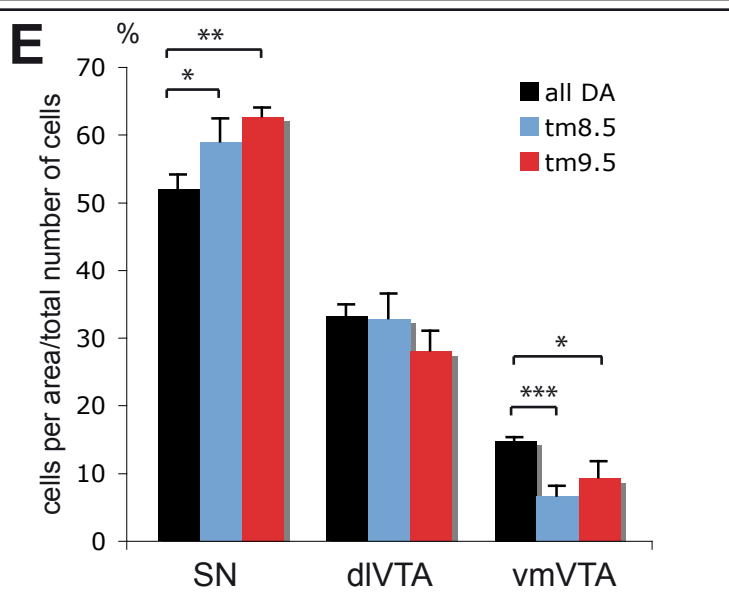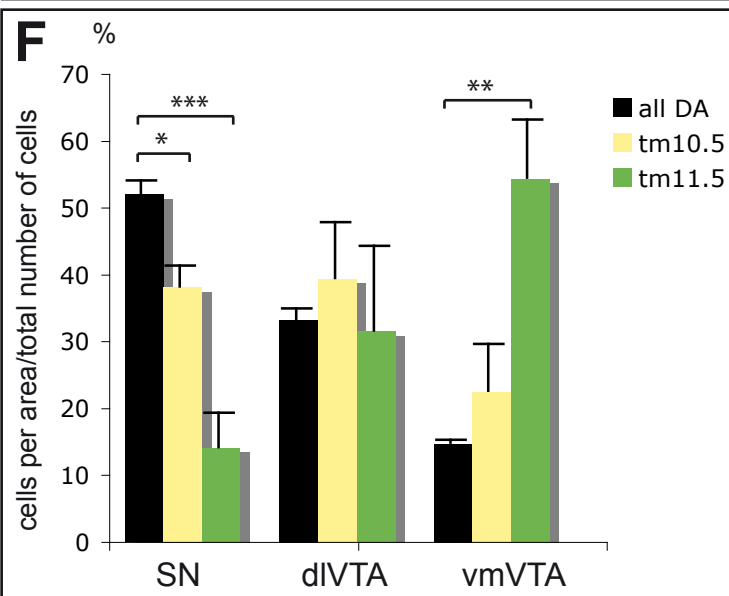

Supplement: MOESM4 [file 13064_2011_173_MOESM4_ESM.PDF]
